# Supplementary material for: Fernandina Wall of Lisbon: Mineralogical and Chemical Characterization of Rammed Earth and Masonry Mortars
Source: MDPI journal article supplement (doi:10.3390/min12020241), 2022-02-13
Supplement: s1 [file s1]

## Complementary XRD Diffractograms and Results of Thermal Gravimetric Analysis

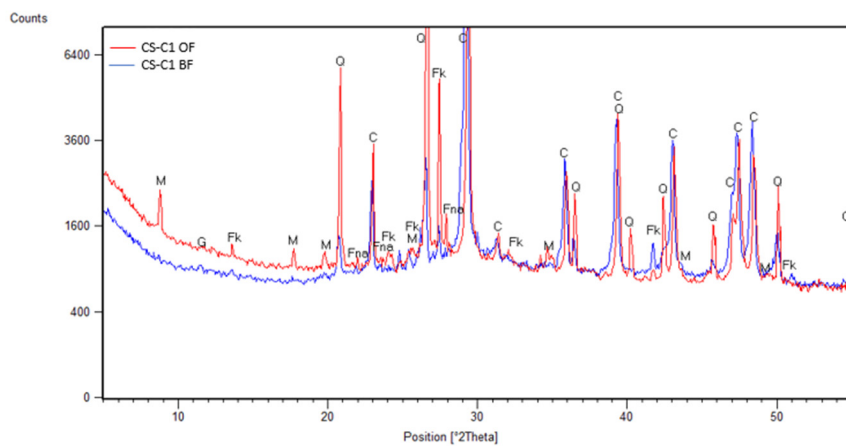

Figure S1. Diffractogram of sample CS-C1.

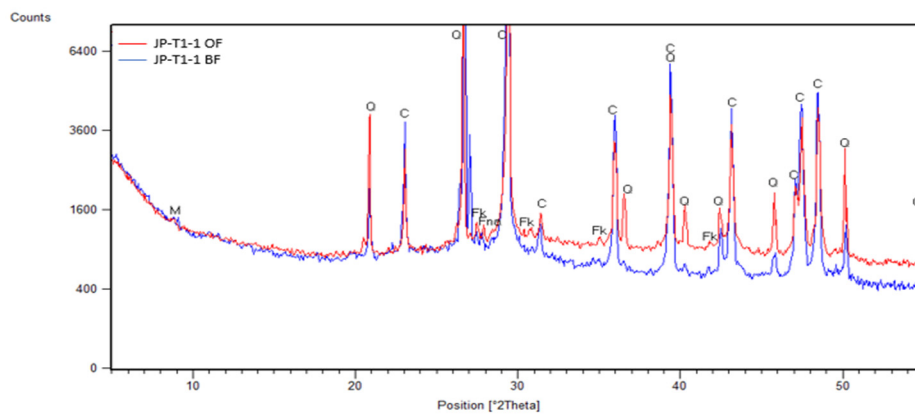

Figure S2. Diffractogram of sample JP-T1-1.

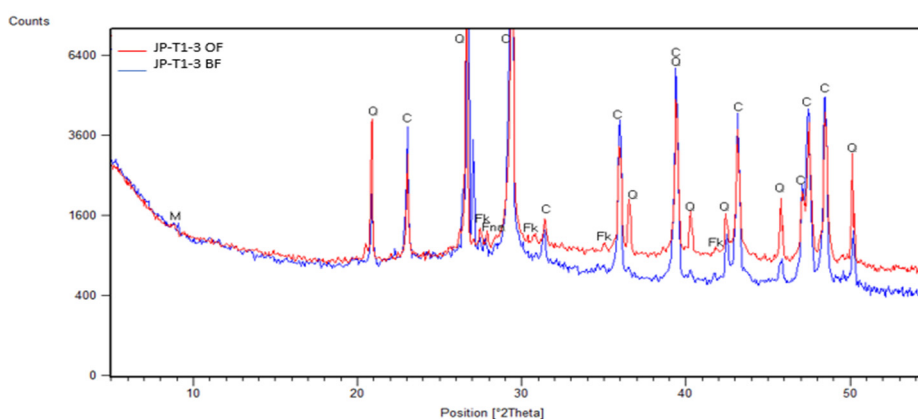

Figure S3. Diffractogram of sample JP-T1-3.

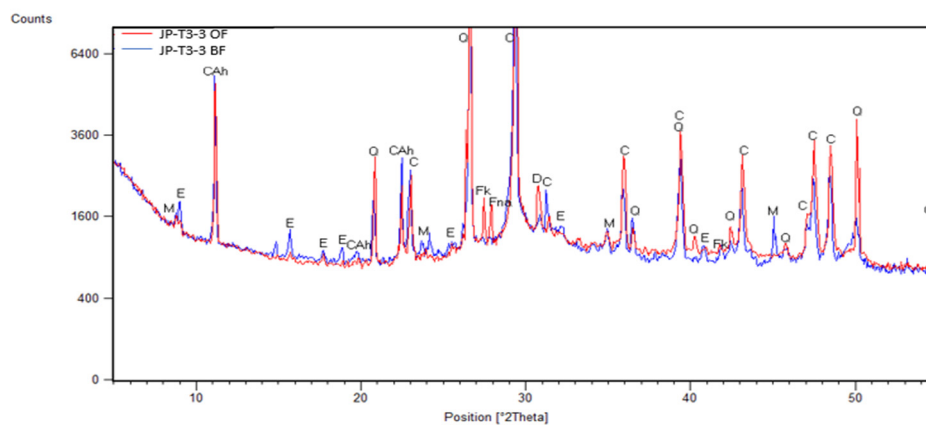

**Figure S4.** Diffractogram of sample JP-T3-3.

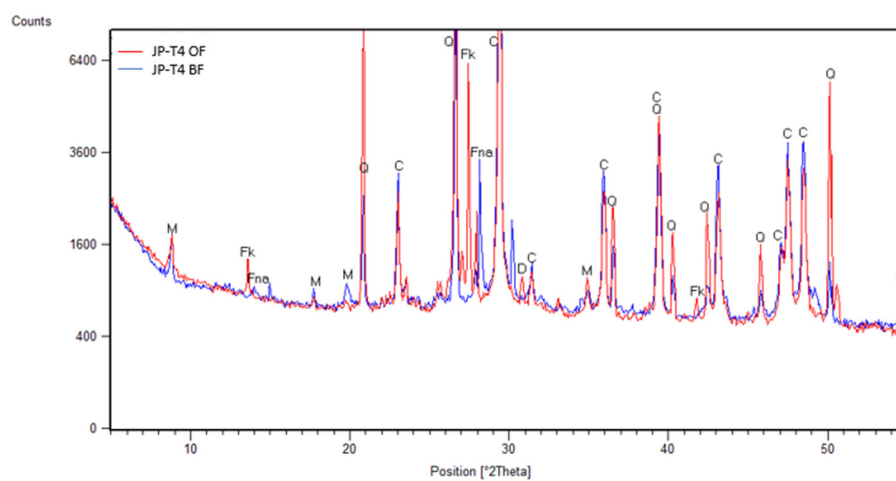

**Figure S5.** Diffractogram of sample JP-T4.

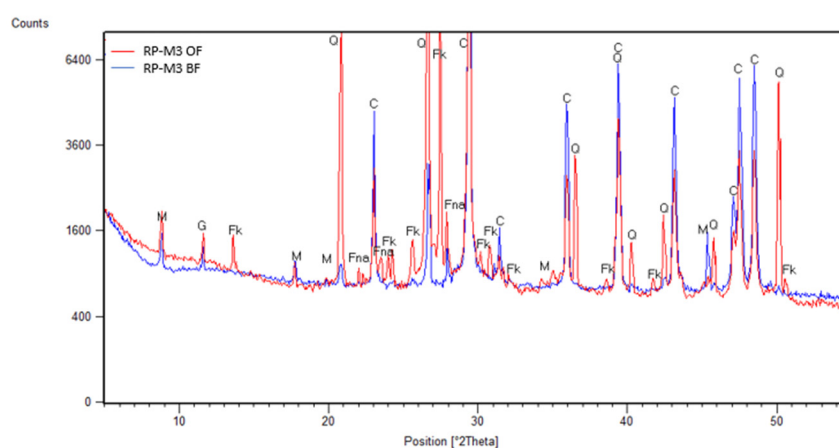

**Figure S6.** Diffractogram of sample RP-M3.

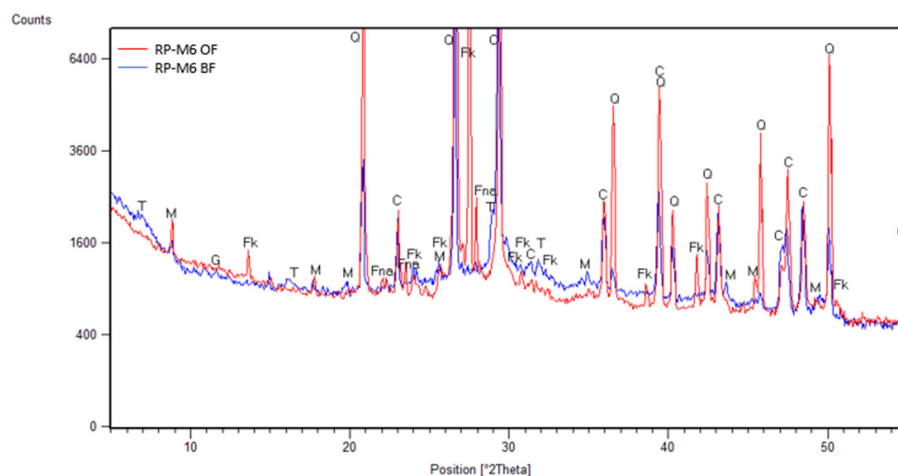

**Figure S7.** Diffractogram of sample RP-M6.

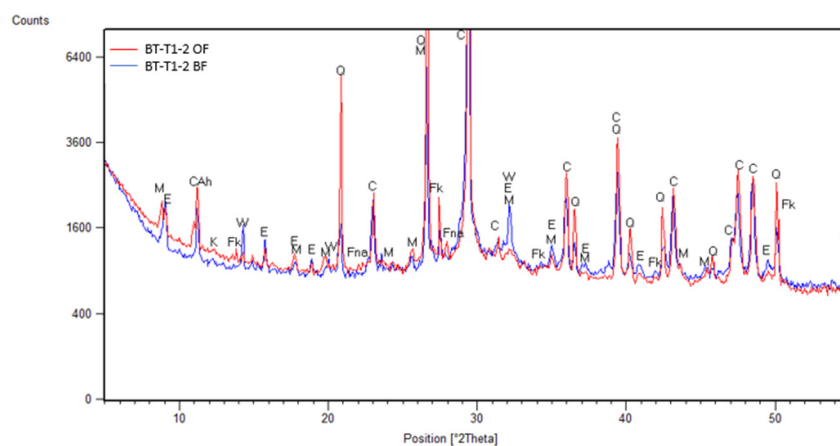

**Figure S8.** Diffractogram of sample BT-T1-2.

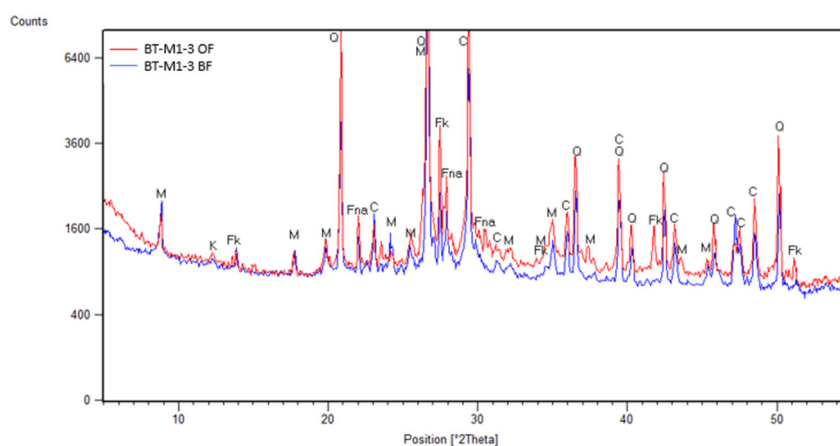

**Figure S9.** Diffractogram of sample BT-M1-3.

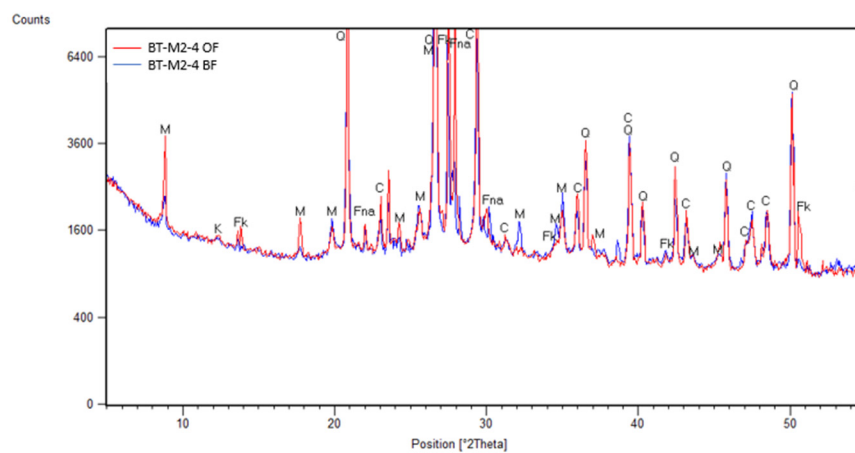

**Figure S10.** Diffractogram of sample BT-M2-4.

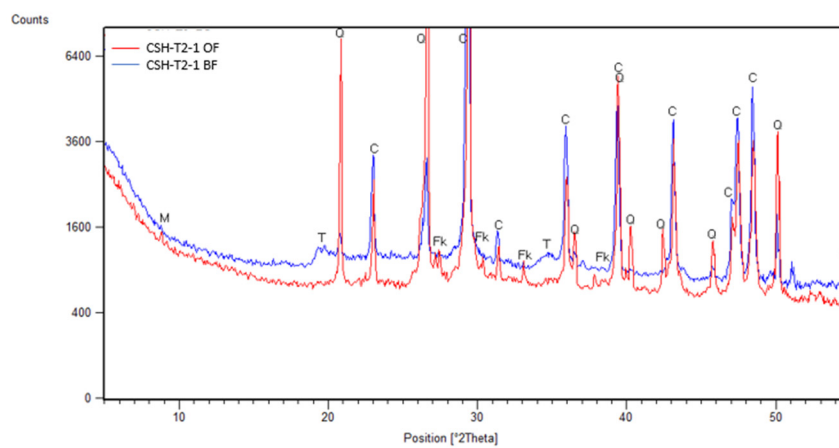

**Figure S11.** Diffractogram of sample CSH-T2-1.

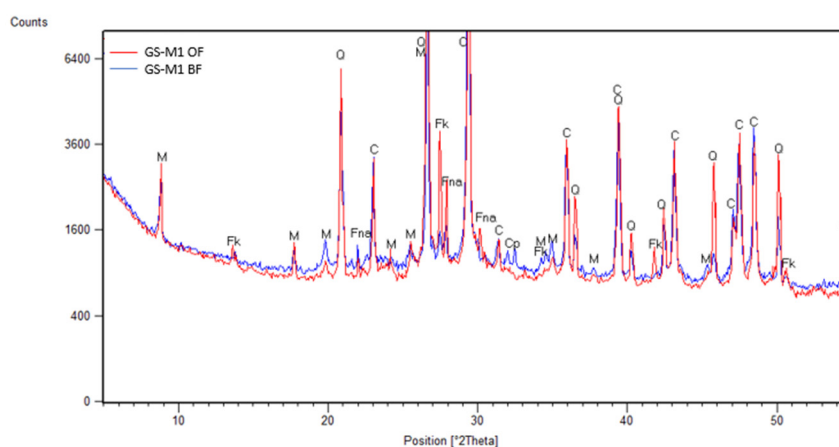

**Figure S12.** Diffractogram of sample GS-M1.

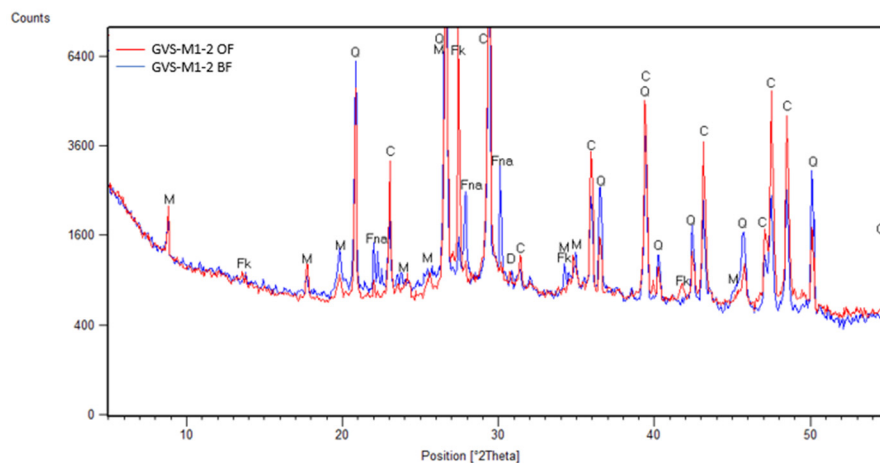

**Figure S13.** Diffractogram of sample GVS-M1-2.

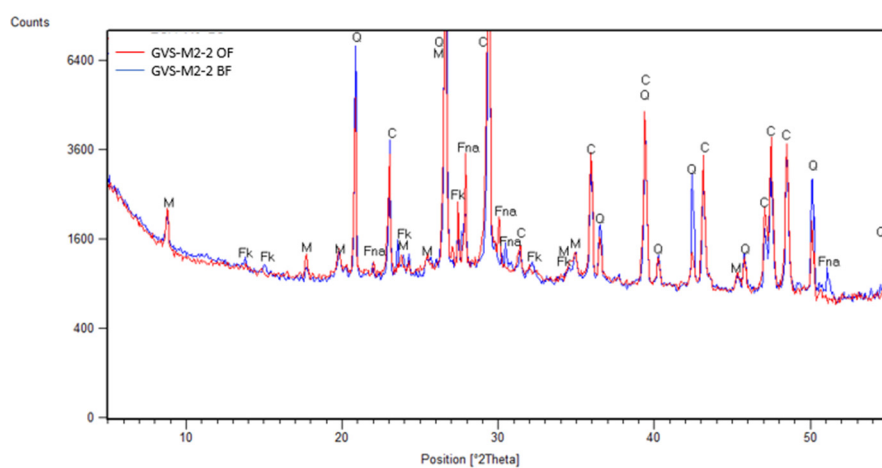

**Figure S14.** Diffractogram of sample GVS-M2-2.

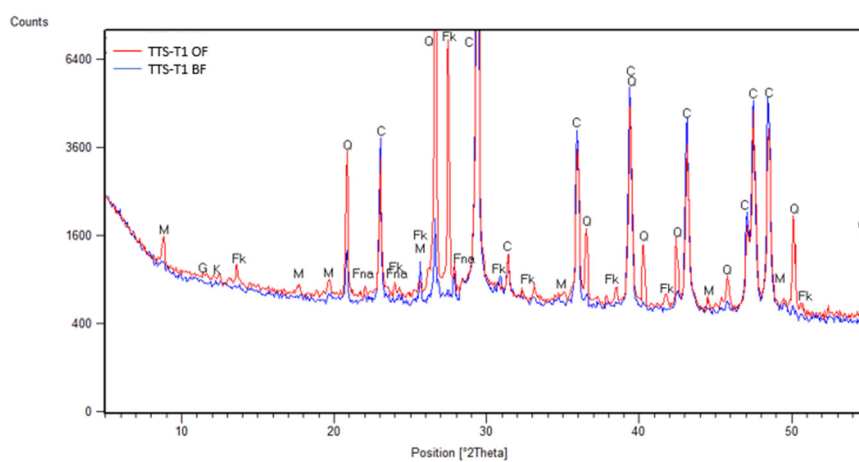

**Figure S15.** Diffractogram of sample TTS-T1.

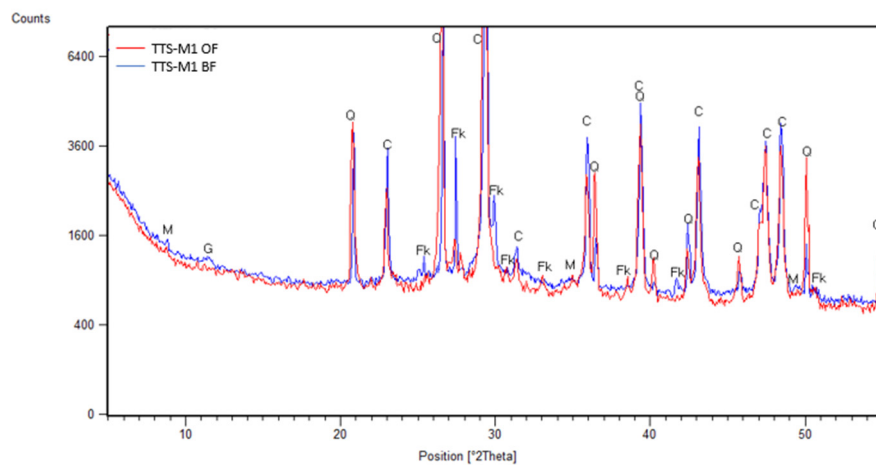

Figure S16. Diffractogram of sample TTS-M1.

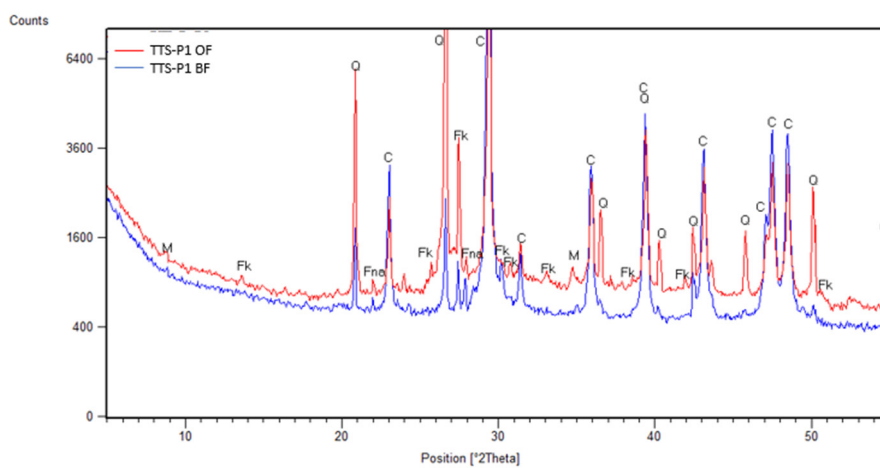

Figure S17. Diffractogram of sample TTS-P1.

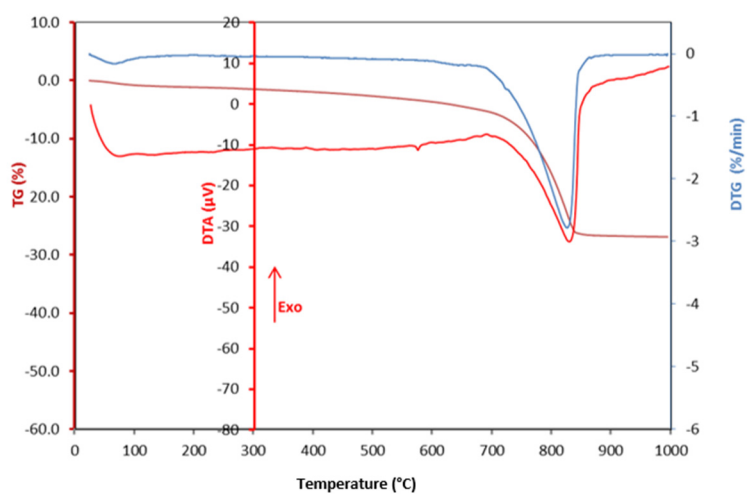

Figure S18. TGA/TG/DTA analysis of sample IP-M1.

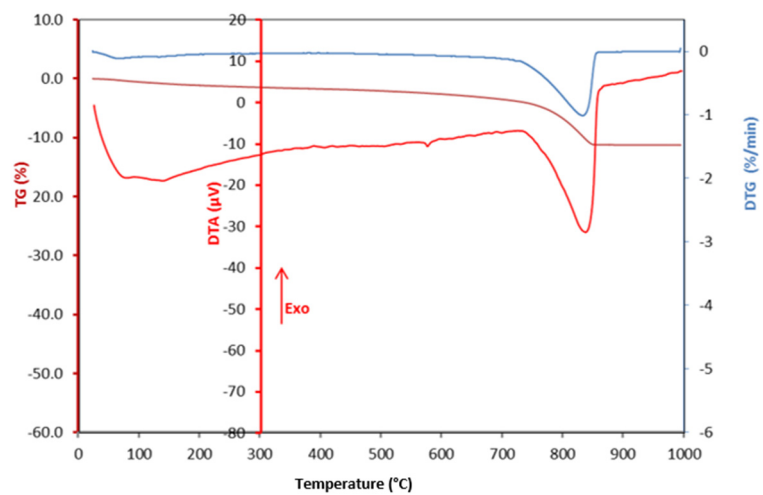

Figure S19. TGA/DTG/DTA analysis of sample CS-C1.

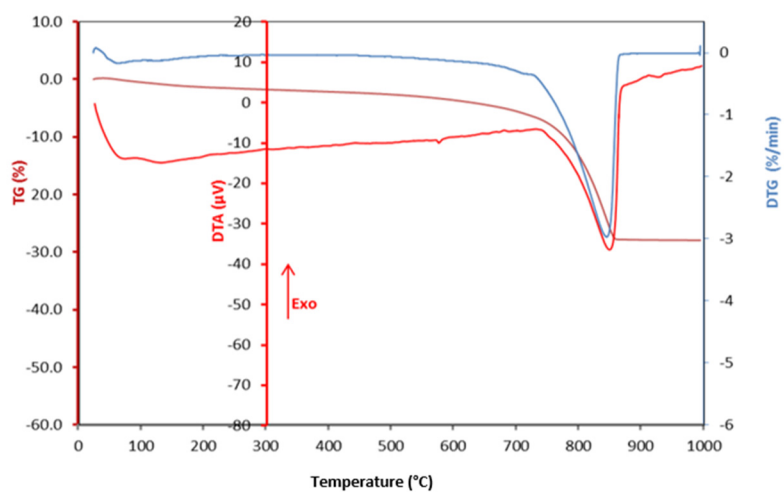

Figure S20. TGA/DTG/DTA analysis of sample JP-T1-1.

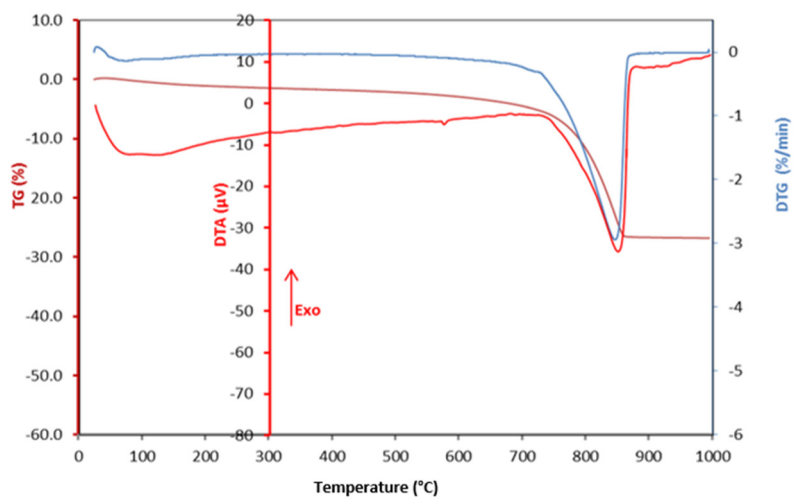

Figure S21. TGA/DTG/DTA analysis of sample JP-T1-3.

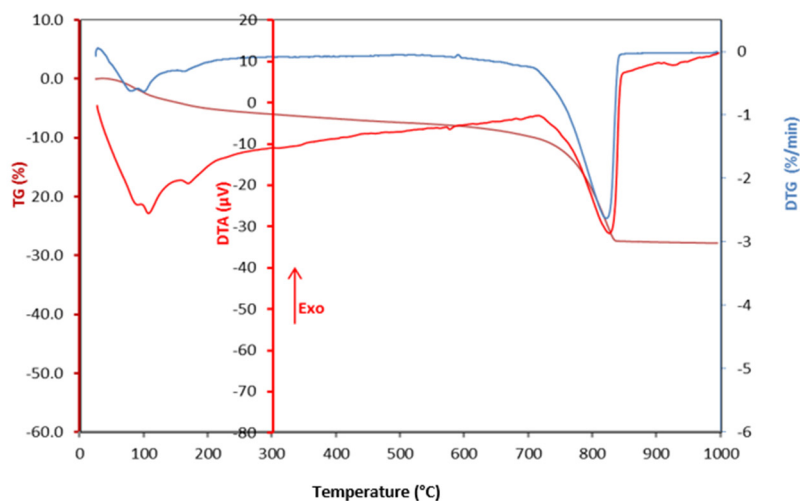

Figure S22. TGA/DTG analysis of sample JP-T3-3.

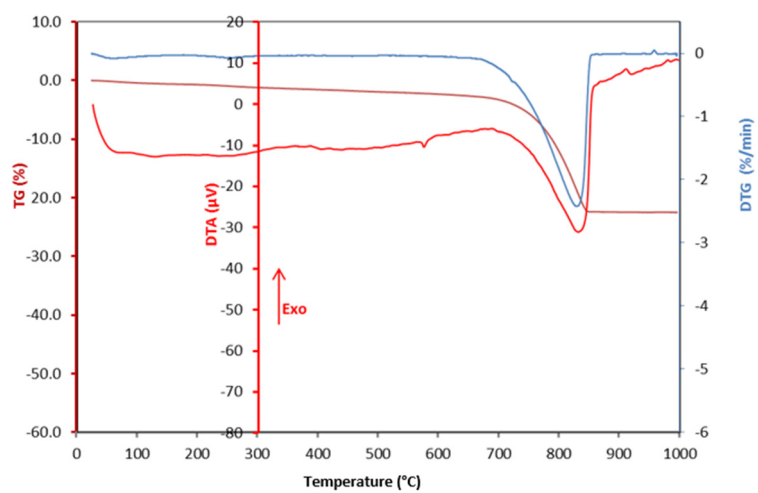

Figure S23. TGA/DTG analysis of sample JP-T4.

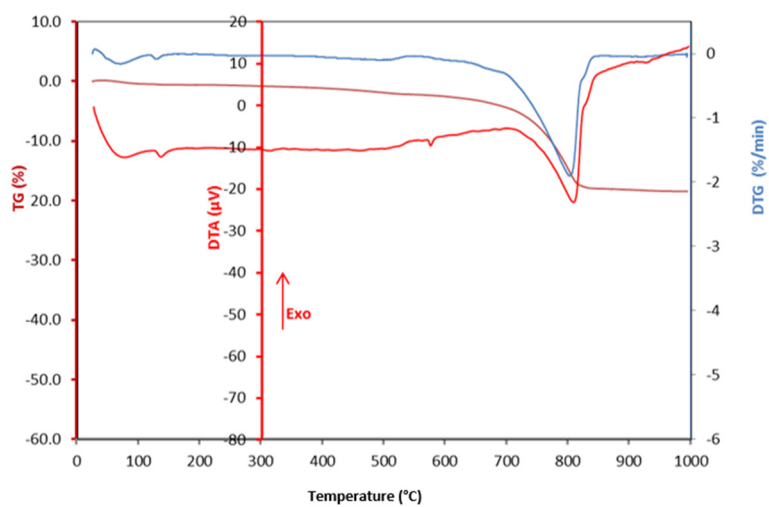

Figure S24. TGA/DTG analysis of sample RP-M3.



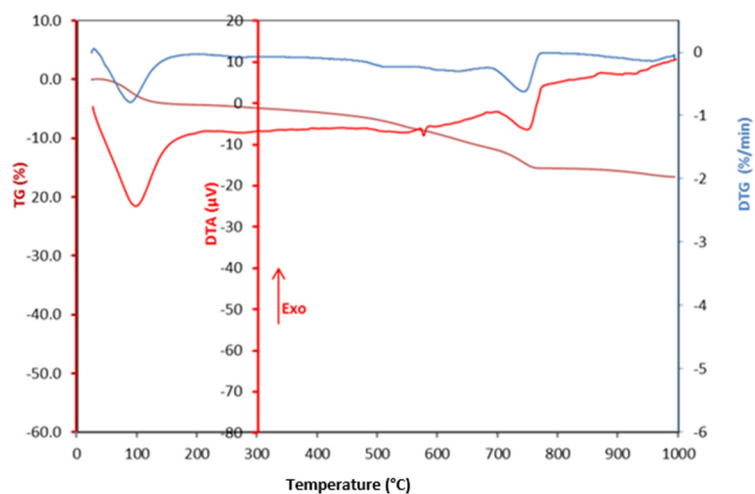

Figure S25. TGA/DTG/DTA analysis of sample RP-M6.

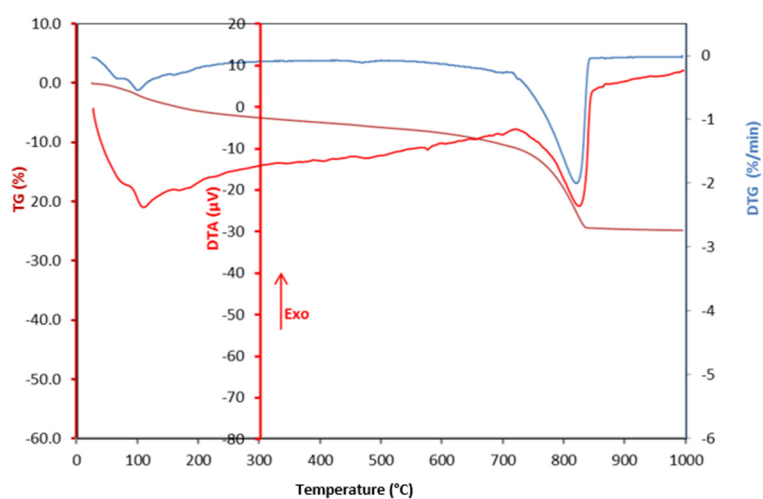

Figure S26. TGA/DTG/DTA analysis of sample BT-T1-2.

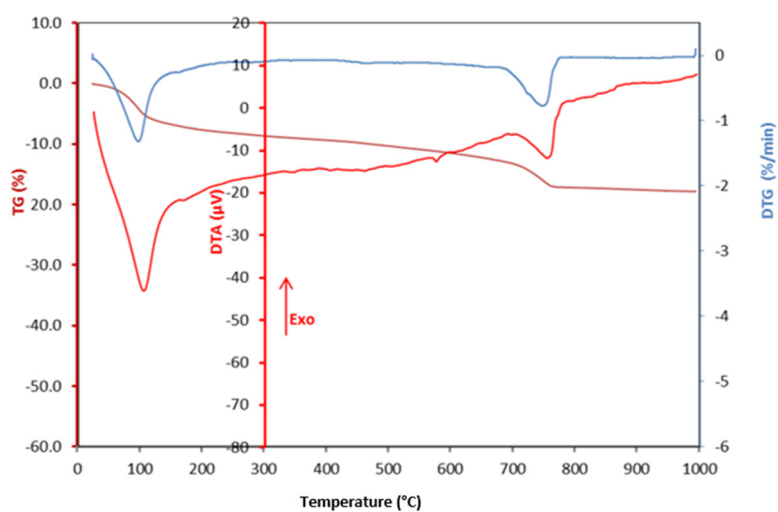

Figure S27. TGA/DTG/DTA analysis of sample BT-M1-3.

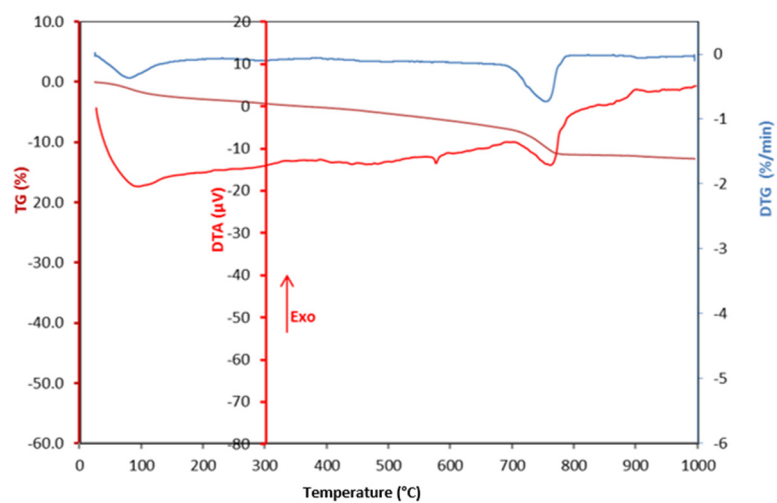

Figure S28. TGA/TG/DTA analysis of sample BT-M2-4.

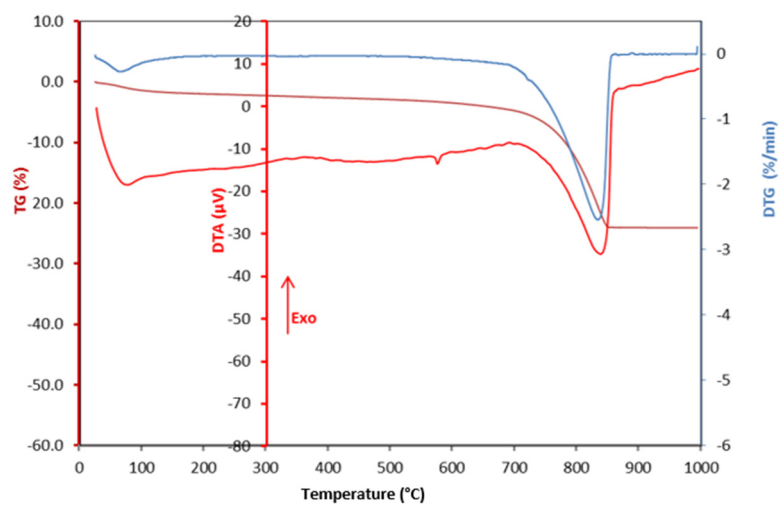

Figure S29. TGA/TG/DTA analysis of sample CSH-T2-1.

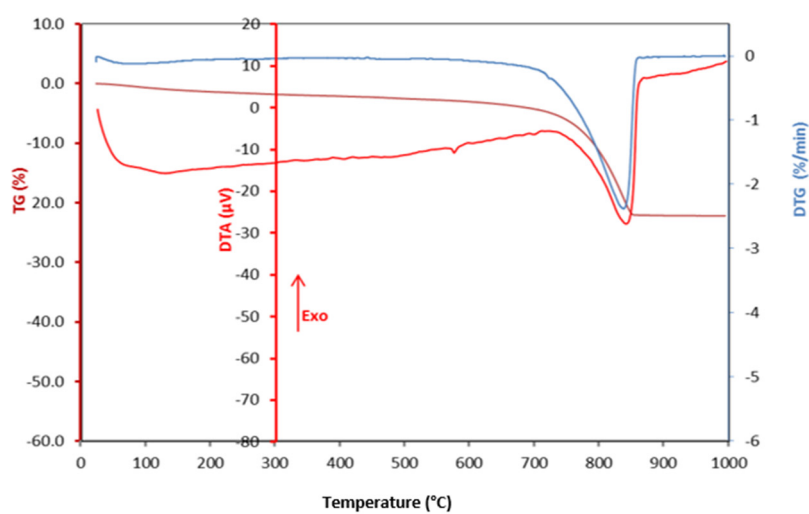

Figure S30. TGA/TG/DTA analysis of sample GS-M1.

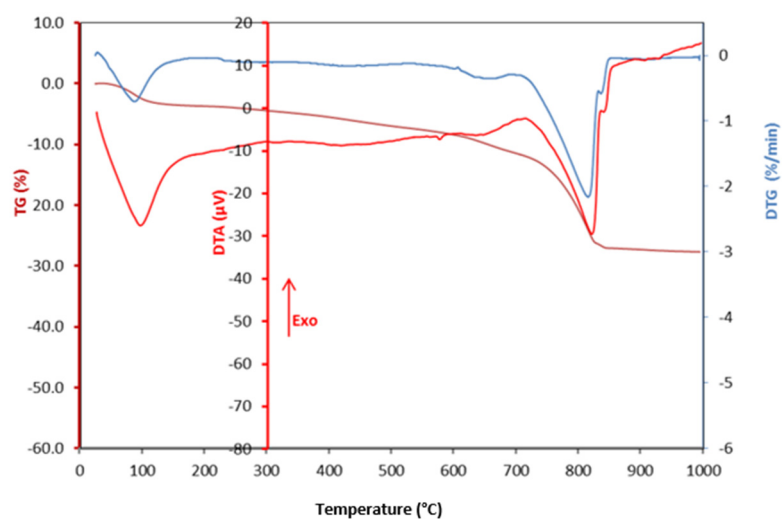

Figure S31. TGA/TG/DTA analysis of sample GVS-M1-2.

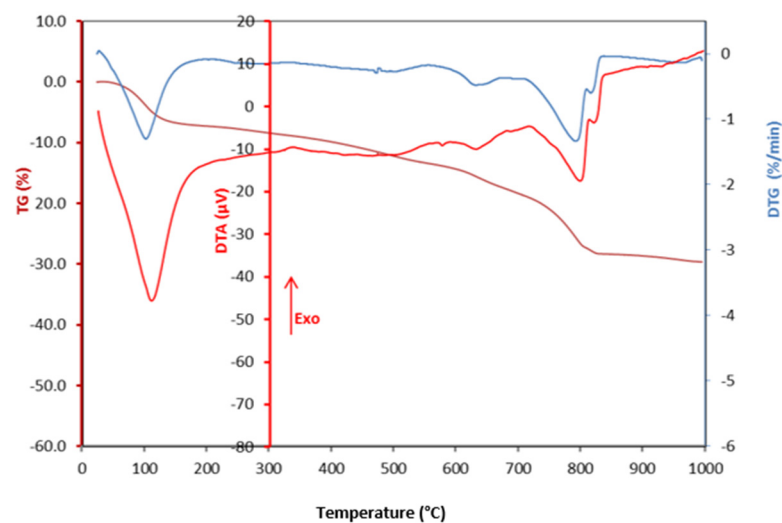

Figure S32. TGA/TG/DTA analysis of sample GVS-M2-2.

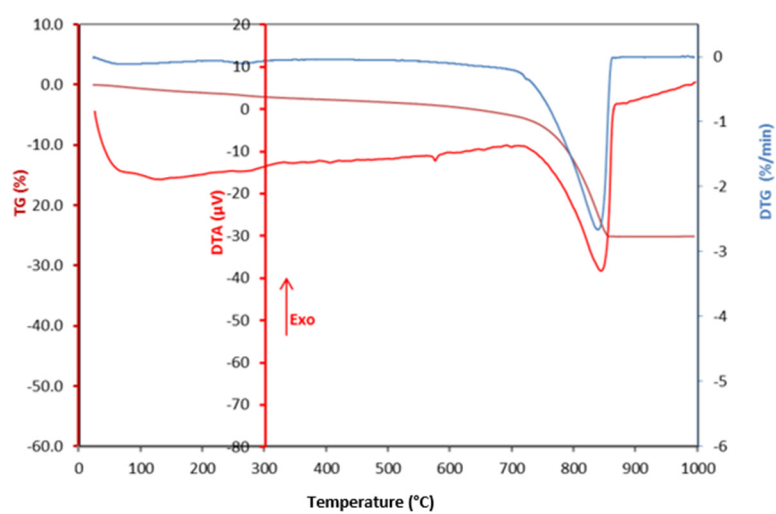

Figure S33. TGA/TG/DTA analysis of sample TTS-M1.

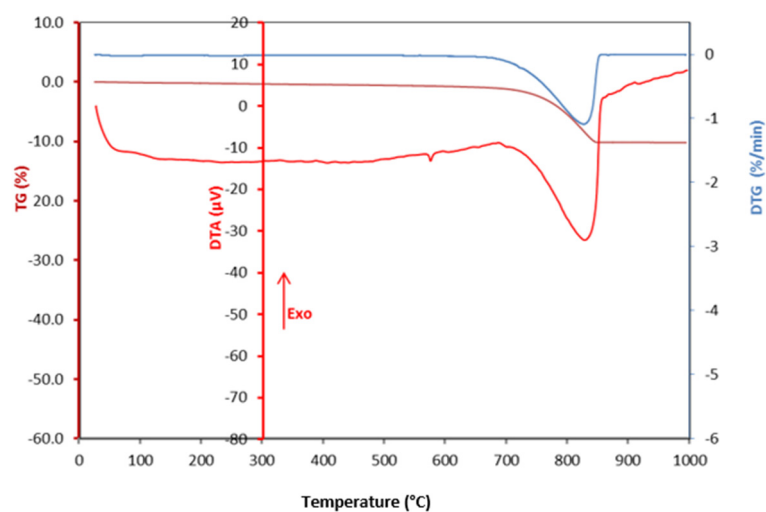

Figure S34. TGA/TG/DTA analysis of sample TTS-P1.
